# Supplementary material
Source: publisher figshare collection journal article supplement (https://acs.figshare.com/ndownloader/files/4178710)
Supplement: Supplementary file 1 [file 4178710]

# Supporting Information

## Adhesion of Polyelectrolyte Multilayers – Sealing and Transfer of Microchamber Arrays

*Maxim V. Kiryukhin,\*<sup>1</sup> Shu Mei Man,<sup>1</sup> Armine Tonoyan,<sup>2</sup> Hong Yee Low,<sup>1</sup> Gleb B. Sukhorukov<sup>3</sup>*

<sup>1</sup>Institute of Materials Research and Engineering, Agency for Science, Technology and Research  
(A\*STAR), 3 Research link, 117602, Singapore

<sup>2</sup>Department of Chemistry, M.V. Lomonosov Moscow State University, Moscow 119992, Russia

<sup>3</sup>School of Engineering and Material Science, Queen Mary University of London, Mile End  
Road, London, E1 4NS, UK

\*Corresponding author: Fax: (+65) 6872 7528 Tel: (+65) 6874 8252 E-mail: kiryukhin-  
m@imre.a-star.edu.sg

## Supporting Information

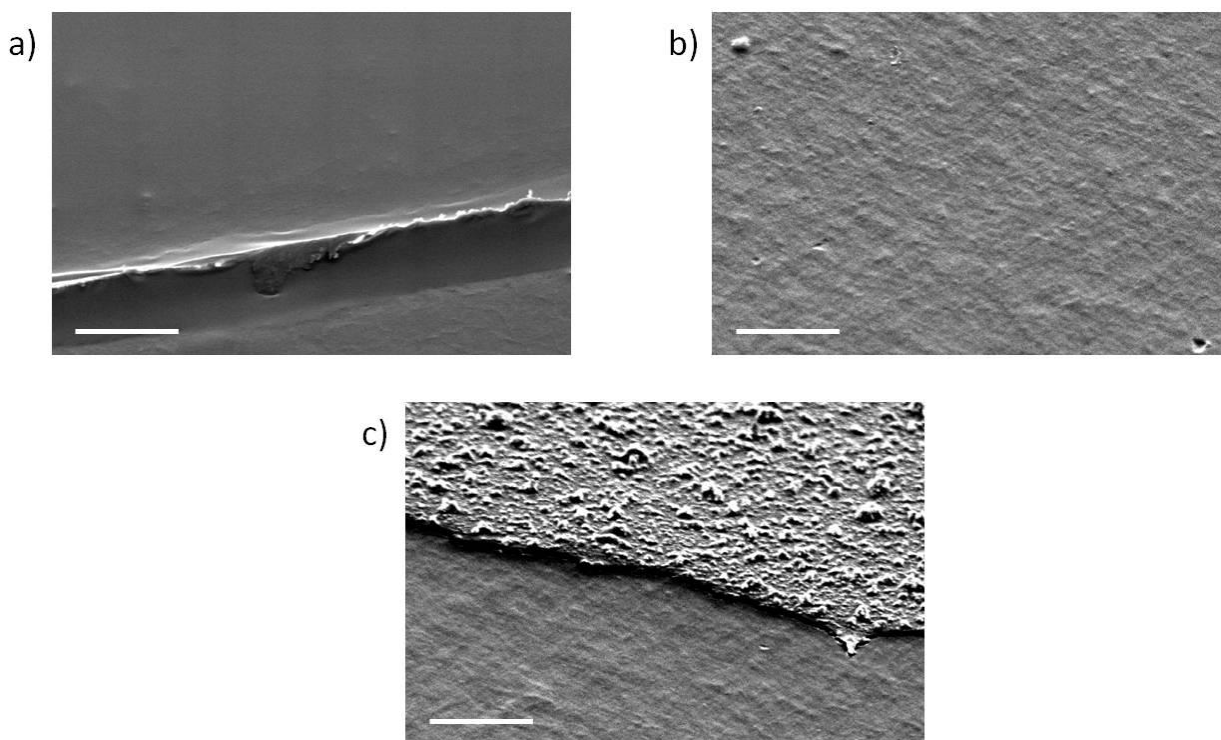

**Figure S1.** Scanning Electron Microscope tilted ( $45^\circ$ ) images of broken surfaces: a)  $\text{SiO}_2 / (\text{PSS-PDADMA})_8 - (\text{PAH-PSS})_{40} / \text{PMMA}$  (bottom); b)  $\text{SiO}_2 / (\text{PSS-PDADMA})_8 - (\text{PAH-PSS})_{40} / \text{PMMA}$  (top); c)  $\text{PMMA} - (\text{PAH-PSS})_{40}$ . All scale bars –  $10 \mu\text{m}$ .

The image of bottom substrate (a) demonstrates an edge of the very smooth reverse surface of the  $(\text{PAH-PSS})_{40}$  multilayer adhered to the  $(\text{PSS-PDADMA})_8$  multilayer. The image of top substrate (b) is typical surface of bare PMMA film. Compare it with the image of the edge of  $(\text{PAH-PSS})_{40}$  multilayer assembled on PMMA film (c). The surface of clear PMMA film has the very same morphology as in (b), the outer surface of the  $(\text{PAH-PSS})_{40}$  multilayer is much more rough than the reverse surface seen at (a).
